# Supplementary material for: Cooperativity between coordinative unsaturated Fe(iii) and aryl-π electrons in MIL-100(Fe) for adsorption of small molecules
Source: Royal Society of Chemistry journal article supplement (doi:10.1039/d4nj01385a), 2024-01-01
Supplement: d4nj01385a1.pdf [file d4nj01385a1.pdf]

## Supporting Information for

### Cooperativity between coordinative unsaturated Fe(III) and aryl- $\pi$ electrons in MIL-100(Fe) for adsorption of small molecules

Yuiko Tasaki-Handa, Kazuki Shibuya, and Shingo Saito

Graduate School of Science and Engineering, Saitama University, Japan.

Email: handa-ytasaki@apc.saitama-u.ac.jp; Tel: +81-70-8819-4717

#### 1. Characterization of the as-synthesized MIL-100(Fe) and the packed column

Fig. S1 shows the XPS high resolution Fe 2p spectrum with fitted curve. Fe<sup>3+</sup> shows two distinguishing peaks at 712.5 and 725.7 eV attributed to Fe 2p<sub>3/2</sub> and Fe 2p<sub>1/2</sub>, with corresponding satellites at 716.4 and 730.0 eV.

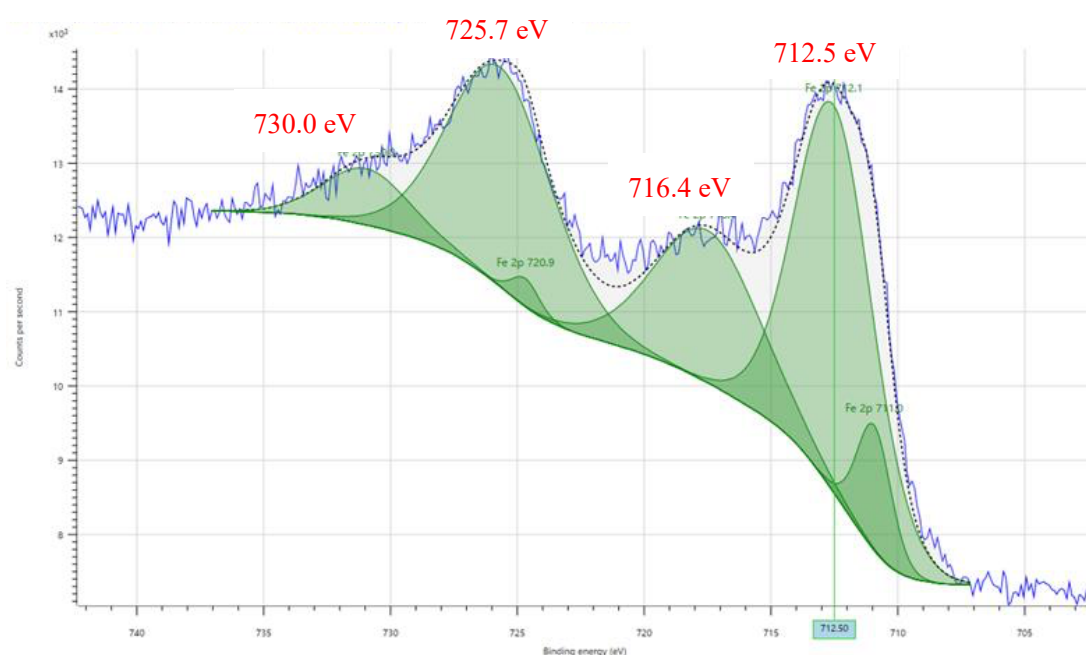

Figure S1. XPS high resolution Fe 2p spectrum of the as-synthesized MIL-100(Fe).

Figure S2 compares chromatograms before and after the flow of 1.0 L mobile phase.

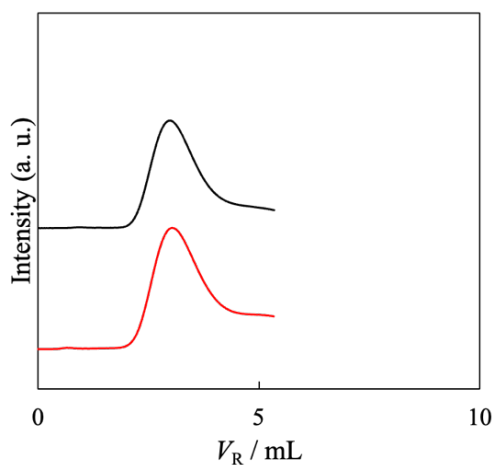

Figure S2 Chromatograms of 1-phenylethanol just after column packing (red) and after 1.0 L of mobile phase flow (black).

Figure S3 shows the excess adsorption isotherm for the MIL-100(Fe) packed column. The excess adsorption of ACN can be calculated as:

$$y_{\text{ACN}} - x_{\text{ACN}} = \frac{V_{\text{ACN}} - V_0}{V_0} x_{\text{ACN}}$$

where  $y_{\text{ACN}}$  and  $x_{\text{ACN}}$  are the volume fractions of ACN in the column and the mobile phase, respectively.<sup>1</sup> The experimental details are shown in the previous paper.<sup>2</sup> When  $x=0.3$  (i.e., 30:70 vol% ACN-water), the excess adsorption ratio is approximately 0.75, indicating the presence of an excess ACN adsorption layer on the MIL-100(Fe). This is consistent with the results of the previous study.<sup>2</sup> Figure S3 compares chromatograms before and after the flow of 1.0 L mobile phase. There is no significant change in the elution time, indicating that the column can be used repeatedly.

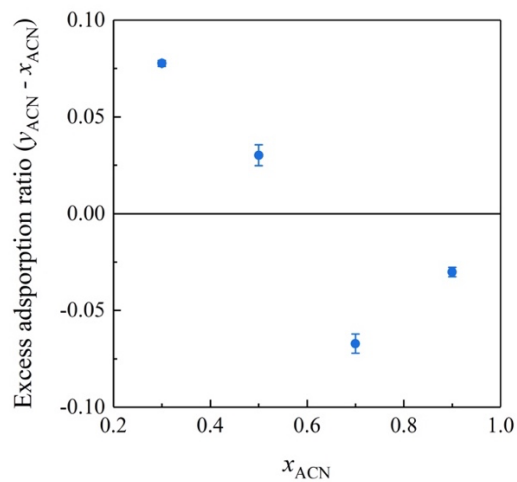

Figure S3 Excess adsorption isotherm of ACN on the as-synthesized MIL-100(Fe).

## 2. Prediction of retention volumes

Retention volumes of benzene, toluene, naphthalene, o-xylene, ethylbenzene, and m-xylene on C18 and Phe stationary phases were too strong under 30:70 vol% ACN-water mobile phase. Their retention volumes under 30:70 vol% ACN-water were determined by prediction of the linear relationship between  $\log k$  and ACN concentration in the range from 45 to 70 vol% (Fig. S4).

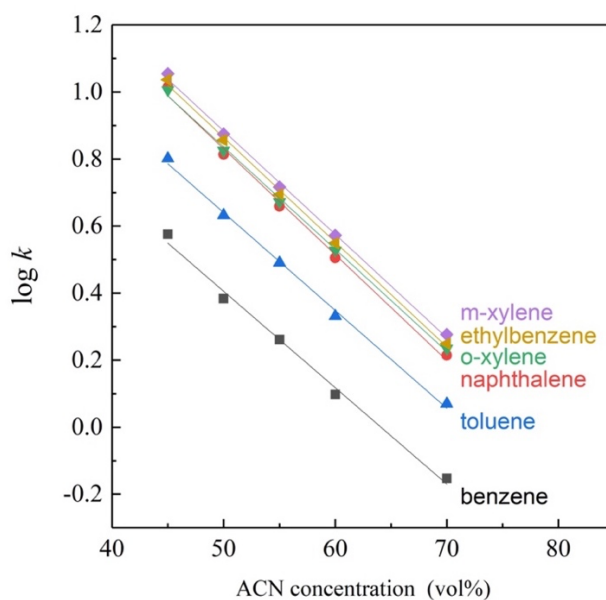

Figure S4 Change in  $\log k$  with ACN concentration in the mobile phase for six aromatic hydrocarbons.

## References

- 1 J. H. Knox and R. Kaliszan, *J. Chromatogr. A*, 1985, **349**, 211–234.
- 2 Y. Tasaki-Handa, M. Yoshikawa, S. Saito and M. Shibukawa, *New J. Chem.*, 2019, **43**, 16566–16571.
